# Supplementary material
Source: Research Square preprint supplement (doi:10.21203/rs.3.rs-9170147/v1)
Supplement: Supplementary file 1 [file 103df7214be0fc15109a25e2.docx]

**Assessment of risk prediction models for chronic kidney disease: a global perspective**

**Supplementary Material**

**Content**

1. Search strategy and terms .......................................................................................... 1

2. Data extraction .......................................................................................................... 4

3. Risk of bias assessment ............................................................................................ 16

4. Reference ................................................................................................................ 19

**1. Search strategy and terms**

All the literature related to chronic kidney disease (CKD) risk prediction models was searched from the following databases:

(1) PubMed (https://www.ncbi.nlm.nih.gov/pubmed/);

(2) Embase (https://www.embase.com/);

(3) Web of Science (https://www.webofscience.com/).

The Search strategy and terms were shown in Supplementary Table S1.

Supplementary Table S1 Search strategy and terms

| Database | Search logic |
| --- | --- |
| PubMed | ("renal insufficiency, chronic"[MeSH Terms] OR ("renal"[All Fields] AND "insufficiency"[All Fields] AND "chronic"[All Fields]) OR "chronic renal insufficiency"[All Fields] OR ("chronic"[All Fields] AND "renal"[All Fields] AND "insufficiencies"[All Fields]) OR "chronic renal insufficiencies"[All Fields] OR ("renal insufficiency, chronic"[MeSH Terms] OR ("renal"[All Fields] AND "insufficiency"[All Fields] AND "chronic"[All Fields]) OR "chronic renal insufficiency"[All Fields] OR ("renal"[All Fields] AND "insufficiencies"[All Fields] AND "chronic"[All Fields]) OR "renal insufficiencies chronic"[All Fields]) OR ("renal insufficiency, chronic"[MeSH Terms] OR ("renal"[All Fields] AND "insufficiency"[All Fields] AND "chronic"[All Fields]) OR "chronic renal insufficiency"[All Fields] OR ("chronic"[All Fields] AND "kidney"[All Fields] AND "insufficiency"[All Fields]) OR "chronic kidney insufficiency"[All Fields]) OR ("renal insufficiency, chronic"[MeSH Terms] OR ("renal"[All Fields] AND "insufficiency"[All Fields] AND "chronic"[All Fields]) OR "chronic renal insufficiency"[All Fields] OR ("chronic"[All Fields] AND "kidney"[All Fields] AND "insufficiencies"[All Fields])) OR ("renal insufficiency, chronic"[MeSH Terms] OR ("renal"[All Fields] AND "insufficiency"[All Fields] AND "chronic"[All Fields]) OR "chronic renal insufficiency"[All Fields] OR ("kidney"[All Fields] AND "insufficiencies"[All Fields] AND "chronic"[All Fields])) OR ("renal insufficiency, chronic"[MeSH Terms] OR ("renal"[All Fields] AND "insufficiency"[All Fields] AND "chronic"[All Fields]) OR "chronic renal insufficiency"[All Fields] OR ("chronic"[All Fields] AND "renal"[All Fields] AND "insufficiency"[All Fields])) OR ("renal insufficiency, chronic"[MeSH Terms] OR ("renal"[All Fields] AND "insufficiency"[All Fields] AND "chronic"[All Fields]) OR "chronic renal insufficiency"[All Fields] OR ("kidney"[All Fields] AND "insufficiency"[All Fields] AND "chronic"[All Fields]) OR "kidney insufficiency chronic"[All Fields]) OR ("renal insufficiency, chronic"[MeSH Terms] OR ("renal"[All Fields] AND "insufficiency"[All Fields] AND "chronic"[All Fields]) OR "chronic renal insufficiency"[All Fields] OR ("chronic"[All Fields] AND "kidney"[All Fields] AND "diseases"[All Fields]) OR "chronic kidney diseases"[All Fields]) OR ("renal insufficiency, chronic"[MeSH Terms] OR ("renal"[All Fields] AND "insufficiency"[All Fields] AND "chronic"[All Fields]) OR "chronic renal insufficiency"[All Fields] OR ("chronic"[All Fields] AND "kidney"[All Fields] AND "disease"[All Fields]) OR "chronic kidney disease"[All Fields]) OR ("renal insufficiency, chronic"[MeSH Terms] OR ("renal"[All Fields] AND "insufficiency"[All Fields] AND "chronic"[All Fields]) OR "chronic renal insufficiency"[All Fields] OR ("disease"[All Fields] AND "chronic"[All Fields] AND "kidney"[All Fields]) OR "disease chronic kidney"[All Fields]) OR ("renal insufficiency, chronic"[MeSH Terms] OR ("renal"[All Fields] AND "insufficiency"[All Fields] AND "chronic"[All Fields]) OR "chronic renal insufficiency"[All Fields] OR ("diseases"[All Fields] AND "chronic"[All Fields] AND "kidney"[All Fields]) OR "diseases chronic kidney"[All Fields]) OR ("renal insufficiency, chronic"[MeSH Terms] OR ("renal"[All Fields] AND "insufficiency"[All Fields] AND "chronic"[All Fields]) OR "chronic renal insufficiency"[All Fields] OR ("kidney"[All Fields] AND "disease"[All Fields] AND "chronic"[All Fields]) OR "kidney disease chronic"[All Fields]) OR ("renal insufficiency, chronic"[MeSH Terms] OR ("renal"[All Fields] AND "insufficiency"[All Fields] AND "chronic"[All Fields]) OR "chronic renal insufficiency"[All Fields] OR ("kidney"[All Fields] AND "diseases"[All Fields] AND "chronic"[All Fields]) OR "kidney diseases chronic"[All Fields]) OR ("renal insufficiency, chronic"[MeSH Terms] OR ("renal"[All Fields] AND "insufficiency"[All Fields] AND "chronic"[All Fields]) OR "chronic renal insufficiency"[All Fields] OR ("chronic"[All Fields] AND "renal"[All Fields] AND "diseases"[All Fields]) OR "chronic renal diseases"[All Fields]) OR ("renal insufficiency, chronic"[MeSH Terms] OR ("renal"[All Fields] AND "insufficiency"[All Fields] AND "chronic"[All Fields]) OR "chronic renal insufficiency"[All Fields] OR ("chronic"[All Fields] AND "renal"[All Fields] AND "disease"[All Fields]) OR "chronic renal disease"[All Fields] OR "kidney failure, chronic"[MeSH Terms] OR ("kidney"[All Fields] AND "failure"[All Fields] AND "chronic"[All Fields]) OR "chronic kidney failure"[All Fields]) OR ("renal insufficiency, chronic"[MeSH Terms] OR ("renal"[All Fields] AND "insufficiency"[All Fields] AND "chronic"[All Fields]) OR "chronic renal insufficiency"[All Fields] OR ("disease"[All Fields] AND "chronic"[All Fields] AND "renal"[All Fields]) OR "disease chronic renal"[All Fields]) OR ("renal insufficiency, chronic"[MeSH Terms] OR ("renal"[All Fields] AND "insufficiency"[All Fields] AND "chronic"[All Fields]) OR "chronic renal insufficiency"[All Fields] OR ("diseases"[All Fields] AND "chronic"[All Fields] AND "renal"[All Fields]) OR "diseases chronic renal"[All Fields]) OR ("renal insufficiency, chronic"[MeSH Terms] OR ("renal"[All Fields] AND "insufficiency"[All Fields] AND "chronic"[All Fields]) OR "chronic renal insufficiency"[All Fields] OR ("renal"[All Fields] AND "disease"[All Fields] AND "chronic"[All Fields]) OR "renal disease chronic"[All Fields]) OR ("renal insufficiency, chronic"[MeSH Terms] OR ("renal"[All Fields] AND "insufficiency"[All Fields] AND "chronic"[All Fields]) OR "chronic renal insufficiency"[All Fields] OR ("renal"[All Fields] AND "diseases"[All Fields] AND "chronic"[All Fields]) OR "renal diseases chronic"[All Fields]) )AND ("Risk"[MeSH Terms] OR ("Risk"[MeSH Terms] OR "Risk"[All Fields] OR "risks"[All Fields] OR ("Risk"[MeSH Terms] OR "Risk"[All Fields] OR ("relative"[All Fields] AND "Risk"[All Fields]) OR "relative risk"[All Fields]) OR ("Risk"[MeSH Terms] OR "Risk"[All Fields] OR ("relative"[All Fields] AND "risks"[All Fields]) OR "relative risks"[All Fields]) OR ("Risk"[MeSH Terms] OR "Risk"[All Fields] OR ("Risk"[All Fields] AND "relative"[All Fields]) OR "risk relative"[All Fields]) OR ("Risk"[MeSH Terms] OR "Risk"[All Fields] OR ("risks"[All Fields] AND "relative"[All Fields]) OR "risks relative"[All Fields]))) AND ("prediction" [All Fields] OR "assessment" [All Fields] OR "model" [All Fields] OR "algorithm" [All Fields]) AND ("valid*" [All Fields] OR "calibra*" [All Fields] OR "accuracy" [All Fields] OR "discrim*" [All Fields]) AND 1900/01/01:2025/10/10 [Date - Publication] |
| Web of Science | TS=("Renal Insufficiency, Chronic" OR "Chronic Renal Insufficiencies" OR "Renal Insufficiencies, Chronic" OR "Chronic Kidney Insufficiency" OR "Chronic Kidney Insufficiencies" OR "Kidney Insufficiencies, Chronic" OR "Chronic Renal Insufficiency" OR "Kidney Insufficiency, Chronic" OR "Chronic Kidney Diseases" OR "Chronic Kidney Disease" OR "Disease, Chronic Kidney" OR "Diseases, Chronic Kidney" OR "Kidney Disease, Chronic" AND "Kidney Diseases, Chronic" OR "Chronic Renal Diseases" OR "Chronic Renal Disease" OR "Disease, Chronic Renal" OR "Diseases, Chronic Renal" OR "Renal Disease, Chronic" OR "Renal Diseases, Chronic") AND TS=("Risk" OR "Risks" OR "Relative Risk" OR "Relative Risks" OR "Risk, Relative" OR "Risks, Relative") AND TS=("prediction" OR "assessment" OR "model" OR "algorithm") AND TS=("valid*" OR "calibra*" OR "accuracy" OR "discrim*" ) AND DOP=(1985-01-01/2025-10-10) |
| Embase | ('chronic kidney failure' OR 'chronic renal insufficiencies' OR 'renal insufficiencies, chronic' OR 'chronic kidney insufficiency' OR 'chronic kidney insufficiencies' OR 'kidney insufficiencies, chronic' OR 'chronic renal insufficiency' OR 'kidney insufficiency, chronic' OR 'chronic kidney diseases' OR 'chronic kidney disease' OR 'disease, chronic kidney' OR 'diseases, chronic kidney' OR 'kidney disease, chronic' OR 'kidney diseases, chronic' OR 'chronic renal diseases' OR 'chronic renal disease' OR 'disease, chronic renal' OR 'diseases, chronic renal' OR 'renal disease, chronic' OR 'renal diseases, chronic') AND ('risk' OR 'risks' OR 'relative risk' OR 'relative risks' OR 'risk, relative' OR 'risks, relative') AND ('prediction' OR 'assessment' OR 'model' OR 'algorithm') AND ('valid*' OR 'calibra*' OR 'accuracy' OR 'discrim*') AND [<1966- 2025]/py |

**2. Data extraction**

The following information was retrieved from each eligible prediction model (Supplementary Table S2, S3, and S4):

(1) Study Basic Information: First author names, year of publication, model name, and country: geographical location(s) of study participants for developing models.

(2) Study design: Concise characterization of research methodology (e.g., prospective cohort versus case-control design).

(3) Study population size: Total participant enrollment, specifying case numbers (e.g., CKD patients) and non-case frequencies within each dataset.

(4) Study classification: Categories of prediction model research. For model development studies, we established 4 distinct classifications.

De novo model development: investigations that constructed novel prediction algorithms using derivation datasets without subsequent external performance evaluation.

Model development with external validation: studies with objectives identical to the first category, yet incorporating additional assessment of predictive accuracy in independent populations (participants distinct from the derivation sample).

Comparative development and validation: research designed to create new predictive instruments while simultaneously benchmarking their performance against established models.

Model updating or extension: investigations focused on refining pre-existing algorithms through coefficient recalibration or predictor modification. Additionally, we classified external validation studies as those exclusively examining the transportability and performance of previously published models in datasets distinct from their original development populations.

(5) Derivation cohort models: Newly developed predictive algorithms from studies categorized as de novo development or development with external validation.

(6) Validation cohort models: Existing models undergoing performance evaluation in studies classified as comparative development/validation or external validation only.

(7) Validation datasets: Specific data sources employed for either algorithm development or performance verification.

(8) Predictors: Predictors were variables evaluated for their association with the outcome of interest, which were ultimately combined to form a prediction model. Included predictors were divided into six categories: demographics, comorbidities, laboratory tests, lifestyle factors, medication use, and special population indicators.

(9) Outcome: Description of model prediction outcome.

(10) Prediction modeling type: Type of statistical analysis used to build a prediction model, including traditional regression-based approaches (e.g., logistic or Cox regression) and machine learning techniques (e.g., XGBoost).

(11) Model Performance

Internal validation: It encompassed performance verification techniques utilizing the identical dataset employed for model derivation. Methodological approaches were hierarchically stratified into four tiers based on contemporary statistical standards: bootstrap resampling, cross-validation, non-random sample partitioning, and random data splitting.

External validation: It involved evaluating predictive transportability utilizing completely independent datasets distinct from the derivation sample. Where such independent validation was conducted, we recorded the validation cohort designation and extracted principal performance indices.

Discrimination: The metric quantified the model's ability to differentiate between subjects who experienced versus those who remained free from the target outcome (diagnostic or prognostic). The predominant measure reported was the area beneath the receiver operating characteristic curve (AUC). Mathematically, the index represented the probability that a randomly selected case received a higher risk score than a randomly selected control. Values of 0.5 signified accuracy equivalent to chance, whereas 1.0 represented perfect discrimination. The benchmarks of ≥0.7 and ≥0.8 typically denoted moderate and excellent discriminatory performance, respectively. We additionally captured supplementary classification metrics, including sensitivity and specificity at predetermined risk thresholds.

Calibration: It assessed the agreement between model-generated probability estimates and empirically observed event frequencies. Calibration statistics quantified the magnitude and direction of predictive deviation (under- or over-estimation) across the complete spectrum of predicted probabilities (frequently stratified by deciles). We extracted the following information: graphical calibration curves comparing predicted versus observed event rates and their calibration slope; the results from the Hosmer-Lemeshow goodness-of-fit procedure.

Supplementary Table S2 Summarized information of 18 included prediction models

| Model name | Study classification | Dataset | Age at baseline* | NCKD/NParticipants  of Derivation cohort | NParticipants of  external validation cohort |
| --- | --- | --- | --- | --- | --- |
| Chien2010[1] | Development and verification | National Taiwan University Hospital Physical Examination Center | Total: 51.2 | 190/5168 | 3205 |
| Dunkler2015[2] | Development and verification | Ongoing Telmisartan Alone and in combination with Ramipril Global Endpoint Trial (ONTARGET)/Outcome Reduction with Initial Glargine Intervention (ORIGIN) | Development 66 (IQR: 61, 71); Internal validation 65 (IQR:59, 70) | 1079/6766 | 8300 |
| Mocroft2015[3] | Development and verification | the Data Collection on Adverse Events of Anti-HIV Drugs(D: A: D research) | Total: 40 (IQR: 33, 46) | 641/17,954 | 4561 |
| Hao2017[4] | Development and verification | HealthInfoNet (HIE) | Total: (40, 65) | 7448/1,310,363 | 1,430,772 |
| Umesawa2018[5] | Development and verification | Annual Health Examination Population (1993-1996) | Total: (40, 74) | 16,464/58,855 | 76,152 |
| Nelson2019[6] | Development and verification | Chronic Kidney Disease Prognosis Consortium (CKD-PC consortium) | without diabetes: 54±16; with diabetes: 62±11 | 660,856/5,222,71 | 2,253,540 |
| Hayes2021[7] | Development and verification | CPRD Aurum (derivation cohort) / CPRD Gold (external validation cohort), electronic health records from primary care | High risk group: 41.58 (IQR: 32.14, 50.72); Low risk group 45.80 (IQR: 36.39, 56.59) | 439/1609 | 934 |
| Gurudas2021[8] | Development and verification | Primary healthcare database | Development: 53.1±12.7; External validation: 57.4±12.4 | 1079/20,510 | 13,346 |
| Lin2022[9] | Development and verification | Diabetes Care Management Plan (DCMP) | Total: 59±10 | 786/4601 | 5795 |
| Yang2022[10] | Development and verification | Kailuan Research | Total: 56 (18, 80) | 1080/12,656 | 2820 |
| Noel2023[11] | Development and verification | Canadian Community Health Survey (CCHS)/OLIS Laboratory Data (OLISLD) | Total: 55±16 | 1981/22,200 | 15,522 |
| Lin2023[12] | Development and verification | Action to Control Cardiovascular Risk in Diabetes (ACCORD)/Harmony Outcomes | Total: (40, 79) | 2257/6006 | 8221 |
| Wang2024[13] | Development and verification | Community random cluster sampling (≥ 60 years old) | Development: 68.24±5.87; Validation queue: 67.68±5.26 | 1516/12,012 | 6248 |
| Luo2024[14] | Development and verification | China Evidence-based Chinese Medicine (CECM) | Total: 46 | 118/6515 | 3152 |
| Fong2025[15] | Development and verification | SingHealth Diabetes Registry/T2DM - CKD Patients | CKD free group: 60 (IQR: 53, 66); CKD group: 64 (IQR: 57, 71); External verification queue: 58 (IQR: 53, 66) | 20,842/42,552 | 2249 |
| Luo2025[16] | Development and verification | National Basic Public Health Service Project Physical Examination Data | Total: 70.5±5.2 | 1088/5416 | 2450 |
| Grant2025[17] | Development and verification | ICES Database&Memorial Sloan Kettering Cancer Center(MSKCC) | Total: 63 (IQR: 56, 70) | 1228/5897 | 5050 |
| Thapa2025[18] | Development and verification | Stanford Sleep Clinic (SSC)/BioSerenity/Multi-Ethnic Study of Atherosclerosis (MESA)/Outcomes of Sleep Disorders in Older Men (MrOS)/ Sleep Heart Health Study (SHHS)/Sleep Heart Health Study(SHHS) | SSC:  training set: 45.00±40.59; validation set: 44.65±42.89; test set: 45.71±40.21; Time validation set: 49.25±39.36; BioSerenity:  training set: 48.71±38.59; validation set: 49.11±41.44; MESA: (45,84);  MrOS: ≥65 | —/51,384 | 5291 |

*Due to different studies using various representations of age, there were several methods as follows: (min, max); Mean±SD; Median (Q1, Q3); Median (min, max). Some studies calculated age by different age groups. For example, (40, 65) meant the minimum age group <40 and the maximum age group ≥65.

Min: Minimum; Max: maximum; SD: Standard Deviation, Q1: Upper quartile; Q3: Lower quartile

Supplementary Table S3 Discrimination information of 18 included prediction models

| Model name | AUC | | | Sensitivity (threshold) | Specificity (threshold) |
| --- | --- | --- | --- | --- | --- |
| Development | Internal validation | External validation |
| Chien2010[1] | — | Clinical model: 0.768 (0.738-0.798); Biochemical model: 0.765 (0.734-0.796) | Clinical model: 0.667 (0.631-0.703) | Clinical model: 0.760; Biochemical model: 0.880 | Clinical model: 0.660; Biochemical model: 0.510 |
| Dunkler2015[2] | — | Laboratory model: 0.680 (0.670-0.680); Clinical model: 0.690 (0.660-0.690) | Laboratory model: 0.680 (0.660-0.700); Clinical model: 0.690 (0.680-0.710) | — | — |
| Mocroft2015[3] | — | Full Risk Score Model: 0.920 (0.900-0.930); Short Risk Score Model: 0.910 (0.900-0.920) | Full Risk Score Model: 0.870 (0.800-0.940); Short Risk Score Model: 0.860 (0.780-0.900) | — | — |
| Hao2017[4] | 0.916 | — | 0.871 | 0.503 (0.496-0.514) | 0.9660 (0.966-0.966) |
| Umesawa2018[5] | Simple Model-women: 0.824; Simple Model-men: 0.823; Full Model-women: 0.826; Full Model-men: 0.827 | — | Simple Model-women 0.814; Simple Model-women 0.827; Full Model-women 0.815; Full Model-men 0.831 | — | — |
| Nelson2019[6] | — | Non-diabetic Model: 0.845 (0.789-0.890); Diabetic Model: 0.801 (0.750-0.819) | Non-diabetic Model: 0.840 (0.830-0.870); Diabetic Model: 0.810 (0.800-0.820) | — | — |
| Hayes2021[7] | Full model: 0.868 (0.844-0.891); 3-var KFRE: 0.828 (0.801-0.855); 3-var EN: 0.852 (0.827-0.876) | — | Full model: 0.879 (0.853-0.904); 3-var KFRE: 0.870 (0.841-0.898); 3-var EN: 0.888 (0.864-0.912) | 0.910 (0.840-0.970) | 0.740 (0.670-0.820) |
| Gurudas2021[8] | Full model: 0.855 (0.846-0.864); Reduced model: 0.855 (0.846-0.863); Minimal model: 0.853 (0.845-0.862) | Full model: 0.853 (0.843-0.863); Reduced model: 0.853 (0.843-0.863); Minimal model: 0.852 (0.842-0.862) | Full model: 0.827 (0.820-0.834); Reduced model: 0.826 (0.819-0.833); Minimal model: 0.824 (0.816-0.832) | — | — |
| Lin2022[9] | 1-y: 0.790; 3-y: 0.790; 5-y: 0.780 | 1-y: 0.740; 3-y: 0.760; 5-y: 0.770 | 1-y: 0.760; 3-y: 0.770; 5-y: 0.760 | — | — |
| Yang2022[10] | — | 0.785 (0.770-0.800) | 0.738 (0.705-0.771) | — | — |
| Noel2023[11] | — | With eGFR:  1-y: 0.863 (0.842-0.885);  2-y: 0.855 (0.841-0.871);  3-y: 0.853 (0.841-0.864);  4-y: 0.844 (0.832-0.855);  5-y: 0.835 (0.822-0.849);  6-y: 0.835 (0.819-0.851);  7-y: 0.824 (0.796-0.862);  8-y 0.776 (0.538-0.938);  Without eGFR:  1-y: 0.828 (0.804-0.853);  2-y: 0.820 (0.804-0.837);  3-y: 0.818 (0.805-0.831);  4-y: 0.813 (0.801-0.827);  5-y: 0.810 (0.798-0.824);  6-y: 0.809 (0.791-0.825);  7-y: 0.792 (0.761-0.829);  8-y: 0.712 (0.301-0.890) | With eGFR:  3-y: 0.778 (0.692-0.864);  4-y: 0.739 (0.684-0.79.2);  5-y: 0.781 (0.742-0.82.0);  6-y: 0.810 (0.761-0.85.8);  Without eGFR  3-y: 0.650 (0.549-0.742);  4-y: 0.623 (0.560-0.686);  5-y: 0.660 (0.616-0.704);  6-y: 0.720 (0.647-0.795) | — | — |
| Lin2023[12] | — | 0.828 (0.812-0.845) | 0.772 (0.767-0.805) | — | — |
| Wang2024[13] | 0.742 (0.728-0.756) | — | 0.881 (0.867-0.895) | — | — |
| Luo2024[14] | 0.881 (0.847-0.914) | 0.851 (0.786-0.916) | 0.918 (0.870-0.967) | — | — |
| Fong2025[15] | ROCKM-18: 2-y: 0.840 (0.830-0.840), 5-y 0.790 (0.790-0.800); ROCKM-12: 2-y: 0.840 (0.830-0.840), 5-y: 0.790 (0.790-0.800); ROCKM-4: 2-y: 0.830 (0.820-0.830), 5-y: 0.780 (0.780-0.790) | — | ROCKM-4: 5-y: 0.880 (0.850-0.910) | ROCKM-18: 2-y: 0.800; 5-y: 0.730; ROCKM-12: 2-y: 0.810; 5-y: 0.730; ROCKM-4: 2-y: 0.810; 5-y: 0.720 | ROCKM-18: 2-y: 0.770; 5-y: 0.760; ROCKM-12: 2-y: 0.770; 5-y: 0.750; ROCKM-4: 2-y: 0.780; 5-y: 0.760 |
| Luo2025[16] | 2-y: 0.831; 3-y: 0.829; 4-y: 0.839 | 0.802 | 2-y: 0.735 | 2-y: 0.832 | 2-y: 0.750 |
| Grant2025[17] | Simple Model-CKD>G4: 0.840 (0.710-0.940); Simple Model-CKD＞G3b: 0.780 (0.690-0.870); Simple Model-CKD: 0.810 (0.760-0.850); machine learning Model-CKD＞G4: 0.910 (0.830-0.980); Machine learning Model-CKD＞G3b: 0.890 (0.840-0.930); Machine learning Model-CKD: 0.860 (0.830-0.890) | Simple Model-CKD>G4: 0.800 (0.780-0.820); Simple Model-CKD>G3b: 0.780 (0.750-0.820); Simple Model-CKD: 0.720 (0.630-0.800) | Simple Model-CKD>G4: 0.810 (0.610-1.000); Simple Model-CKD>G3b: 0.870 (0.800-0.920); Simple Model-CKD: 0.730 (0.660-0.780) | — | — |
| Thapa2025[18] | 0.750 (0.700-0.760) | 0.820 (0.790–0.850) | 0.720 (0.660, 0.770) | — | — |

Supplementary Table S4 Calibration information of 18 included prediction models

| Model name | Hosmer-Lemeshow test | Calibration curve | Calibration slope |
| --- | --- | --- | --- |
| Chien2010[1] | P=0.85 | P>0.10 | — |
| Dunkler2015[2] | — | — | Laboratory Model-Internal Validation: 0.880;  Clinical Model-Internal Validation: 0.980;  Laboratory Model-External Validation: 1.010;  Clinical Model-External Validation: 1.040 |
| Mocroft2015[3] | — | — | — |
| Hao2017[4] | — | — | — |
| Umesawa2018[5] | — | √ | — |
| Nelson2019[6] | — | Nine of the 13 study populations (69%) shown a slope of observed to predicted risk between 0.80 and 1.25 | Diabetic Model- External Validation: 1.000 (0.800-1.250);  Non-diabetic Model- External Validation: 1.000 (0.800-1.250); |
| Hayes2021[7] | — | — | Full model-External Validation: 1.290 |
| Gurudas2021[8] | — | — | Model 1-3-External Validation: 1.010 (1.020-1.030) |
| Lin2022[9] | P>0.05 | √ | — |
| Yang2022[10] | — | — | Internal Validation: 1.129; External Validation: 0.841 |
| Noel2023[11] | — | — | With eGFR Model, 5-yr: 1.000 (0.940-1.060); With eGFR Model, 3-yr: 1.090 (1.010-1.170); With eGFR Model, 1-yr: 1.000 (0.840-1.160);  Without eGFR Model, 5-yr: 0.990 (0.920-1.060); Without eGFR Model, 3-yr :1.080 (0.880-1.280); Without eGFR Model, 1-yr: 1.080 (0.880-1.280) |
| Lin2023[12] | — | — | — |
| Wang2024[13] | — | √ | Development: 1; External Validation 1.842 |
| Luo2024[14] | — | √ | — |
| Fong2025[15] | — | √ | — |
| Luo2025[16] | — | √ | — |
| Grant2025[17] | — | √ | — |
| Thapa2025[18] | — | — | — |

**3. Risk of bias assessment**

For each CKD prediction model, risk of bias (ROB), which indicated the likelihood of systematic distortions in performance due to shortcomings in study design, was evaluated using the Prediction Model Risk Of Bias Assessment Tool (PROBAST). The signal questions of the four domains are as follows:

**Participants**

Q1: Were appropriate data sources used, e.g., cohort, RCT, or nested case-control study data?

Q2: Were all the inclusions and exclusions of participants appropriate?

**Predictors**

Q1: Were predictors defined and assessed in a similar way for all participants?

Q2: Were predictor assessments made without knowledge of outcome data?

Q3: Are all predictors available at the time the model is intended to be used?

**Outcomes**

Q1: Was the outcome determined appropriately?

Q2: Was a pre-specified or standard outcome definition used?

Q3: Were predictors excluded from the outcome definition?

Q4: Was the outcome defined and determined in a similar way for all participants?

Q5: Was the outcome determined without knowledge of predictor information?

Q6: Was the time interval between predictor assessment and outcome determination appropriate?

**Analysis**

Q1: Were there a reasonable number of participants with the outcome?

Q2: Were continuous and categorical predictors handled appropriately?

Q3: Were all enrolled participants included in the analysis?

Q4: Were participants with missing data handled appropriately?

Q5: Was the selection of predictors based on univariable analysis avoided? (not applicable to validation analysis)

Q6: Were complexities in the data (e.g., censoring, competing risks, sampling of control participants) accounted for appropriately?

Q7: Were relevant model performance measures evaluated appropriately?

Q8: Were model overfitting, underfitting, and optimism in model performance accounted for? (not applicable to validation analysis)

Q9: Do predictors and their assigned weights in the final model correspond to the results from the reported multivariable analysis? (not applicable to validation analysis)

Supplementary Table S5 Risk of bias assessment of 18 included prediction models based on PROBAST

| Model name | Participants | | Predictors | | | Outcome | | | | | | Analysis | | | | | | | | | Participants | Predictors | Outcome | Analysis | Overall |
| --- | --- | --- | --- | --- | --- | --- | --- | --- | --- | --- | --- | --- | --- | --- | --- | --- | --- | --- | --- | --- | --- | --- | --- | --- | --- |
| Q1 | Q2 | Q1 | Q2 | Q3 | Q1 | Q2 | Q3 | Q4 | Q5 | Q6 | Q1 | Q2 | Q3 | Q4 | Q5 | Q6 | Q7 | Q8 | Q9 |
| Chien2010[1] | Y | Y | Y | Y | Y | Y | Y | Y | Y | PY | Y | Y | Y | PY | NI | Y | Y | Y | PN | Y | Low | Low | Low | High | High |
| Dunkler2015[2] | Y | PY | Y | N | Y | Y | Y | N | Y | Y | Y | Y | Y | PY | N | Y | Y | Y | Y | Y | Low | High | High | High | High |
| Mocroft2015[3] | Y | PN | Y | Y | Y | Y | Y | Y | Y | Y | Y | Y | Y | PN | N | N | PY | N | N | Y | High | Low | Low | High | High |
| Hao2017[4] | Y | PY | Y | Y | Y | Y | Y | Y | Y | Y | Y | Y | Y | PY | PN | Y | PY | N | Y | Y | Low | Low | Low | High | High |
| Umesawa2018[5] | Y | Y | Y | N | Y | Y | Y | N | Y | Y | Y | Y | Y | Y | NI | Y | PY | PN | N | Y | Low | High | High | High | High |
| Nelson2019[6] | Y | Y | Y | N | Y | Y | Y | N | Y | Y | Y | Y | Y | PY | N | Y | Y | Y | Y | Y | Low | High | High | High | High |
| Hayes2021[7] | Y | Y | Y | Y | Y | Y | Y | Y | Y | Y | Y | Y | Y | Y | PY | Y | PN | Y | Y | Y | Low | Low | Low | High | High |
| Gurudas2021[8] | Y | PY | Y | N | Y | Y | Y | N | Y | Y | Y | Y | Y | Y | PY | Y | Y | Y | Y | Y | Low | High | High | Low | High |
| Lin2022[9] | Y | PY | Y | Y | Y | Y | Y | Y | Y | Y | Y | Y | Y | Y | Y | PN | Y | Y | Y | Y | Low | Low | Low | Low | Low |
| Yang2022[10] | Y | PY | Y | Y | Y | Y | Y | Y | Y | Y | Y | Y | Y | PY | N | Y | Y | Y | Y | Y | Low | Low | Low | High | High |
| Noel2023[11] | Y | Y | PY | PY | Y | Y | Y | PY | Y | Y | Y | Y | Y | Y | Y | Y | Y | Y | Y | Y | Low | Low | Low | Low | Low |
| Lin2023[12] | Y | PY | Y | N | Y | Y | Y | N | Y | Y | Y | Y | Y | PY | NI | Y | Y | Y | PN | Y | Low | High | High | NI | High |
| Wang2024[13] | Y | PY | Y | Y | Y | Y | Y | Y | Y | Y | Y | Y | Y | PY | N | N | PN | Y | N | Y | Low | Low | Low | High | High |
| Luo2024[14] | Y | Y | Y | Y | Y | Y | Y | Y | Y | Y | Y | Y | Y | Y | Y | N | PY | Y | Y | Y | Low | Low | Low | High | High |
| Fong2025[15] | Y | Y | Y | N | Y | Y | Y | N | Y | Y | Y | Y | Y | Y | Y | PY | Y | Y | N | Y | Low | High | High | High | High |
| Luo2025[16] | Y | Y | Y | N | Y | Y | Y | N | Y | Y | Y | Y | Y | Y | Y | N | PY | Y | Y | Y | Low | High | High | High | High |
| Grant2025[17] | Y | Y | Y | Y | Y | Y | Y | Y | Y | Y | Y | Y | Y | Y | Y | Y | PY | Y | PY | Y | Low | Low | Low | Low | Low |
| Thapa2025[18] | Y | Y | Y | Y | Y | Y | Y | Y | Y | Y | Y | Y | Y | PY | PY | Y | PY | N | Y | Y | Low | Low | Low | High | High |

Y, yes; N, no; PY, probably yes; PN, probably no; NI, no information; NA, not applicable; ROB, risk of bias; Low = low risk of bias; High = high risk of bias

**4. Reference**

1. Chien K-L, Lin H-J, Lee B-C, Hsu H-C, Lee Y-T, Chen M-F. A prediction model for the risk of incident chronic kidney disease. Am J Med. 2010;123:836-846.e2. https://doi.org/10.1016/j.amjmed.2010.05.010.

2. Dunkler D, Gao P, Lee SF, Heinze G, Clase CM, Tobe S, et al. Risk Prediction for Early CKD in Type 2 Diabetes. Clin J Am Soc Nephrol. 2015;10:1371–9. https://doi.org/10.2215/CJN.10321014.

3. Mocroft A, Lundgren JD, Ross M, Law M, Reiss P, Kirk O, et al. Development and validation of a risk score for chronic kidney disease in HIV infection using prospective cohort data from the D:A:D study. PLoS Med. 2015;12:e1001809. https://doi.org/10.1371/journal.pmed.1001809.

4. Hao S, Fu T, Wu Q, Jin B, Zhu C, Hu Z, et al. Estimating One-Year Risk of Incident Chronic Kidney Disease: Retrospective Development and Validation Study Using Electronic Medical Record Data From the State of Maine. JMIR Med Inform. 2017;5:e21. https://doi.org/10.2196/medinform.7954.

5. Umesawa M, Sairenchi T, Haruyama Y, Nagao M, Yamagishi K, Irie F, et al. Validity of a Risk Prediction Equation for CKD After 10 Years of Follow-up in a Japanese Population: The Ibaraki Prefectural Health Study. Am J Kidney Dis. 2018;71:842–50. https://doi.org/10.1053/j.ajkd.2017.09.013.

6. Nelson RG, Grams ME, Ballew SH, Sang Y, Azizi F, Chadban SJ, et al. Development of Risk Prediction Equations for Incident Chronic Kidney Disease. JAMA. 2019;322:2104–14. https://doi.org/10.1001/jama.2019.17379.

7. Hayes JF, Osborn DPJ, Francis E, Ambler G, Tomlinson LA, Boman M, et al. Prediction of individuals at high risk of chronic kidney disease during treatment with lithium for bipolar disorder. BMC Med. 2021;19:99. https://doi.org/10.1186/s12916-021-01964-z.

8. Gurudas S, Nugawela M, Prevost AT, Sathish T, Mathur R, Rafferty JM, et al. Development and validation of resource-driven risk prediction models for incident chronic kidney disease in type 2 diabetes. Sci Rep. 2021;11:13654. https://doi.org/10.1038/s41598-021-93096-w.

9. Lin C-C, Niu MJ, Li C-I, Liu C-S, Lin C-H, Yang S-Y, et al. Development and validation of a risk prediction model for chronic kidney disease among individuals with type 2 diabetes. Sci Rep. 2022;12:4794. https://doi.org/10.1038/s41598-022-08284-z.

10. Yang X, Zhou B, Zhou L, Cui L, Zeng J, Wang S, et al. Development and Validation of Prediction Models for Hypertensive Nephropathy, the PANDORA Study. Front Cardiovasc Med. 2022;9:794768. https://doi.org/10.3389/fcvm.2022.794768.

11. Noel AJ, Eddeen AB, Manuel DG, Rhodes E, Tangri N, Hundemer GL, et al. A Health Survey-Based Prediction Equation for Incident CKD. Clin J Am Soc Nephrol. 2023;18:28–35. https://doi.org/10.2215/CJN.0000000000000035.

12. Liao L-N, Li T-C, Yeh C-C, Li C-I, Liu C-S, Yang C-W, et al. Risk prediction of nephropathy by integrating clinical and genetic information among adult patients with type 2 diabetes. Acta Diabetol. 2023;60:413–24. https://doi.org/10.1007/s00592-022-02017-4.

13. Wang T, Zhou Z, Ren L, Shen Z, Li J, Zhang L. Prediction of the risk of 3-year chronic kidney disease among elderly people: a community-based cohort study. Ren Fail. 2024;46:2303205. https://doi.org/10.1080/0886022X.2024.2303205.

14. Luo C, Fu L, Liu L, Chen M, Chen K, Li Y, et al. Development, validation, and visualization of a web-based nomogram for predicting chronic kidney disease incidence at health examination centers. Ren Fail. 2024;46:2398183. https://doi.org/10.1080/0886022X.2024.2398183.

15. Fong JMN, Low S, Xu Y, Teo PSE, Lim GH, Zheng H, et al. Risk of onset of chronic kidney disease in type 2 diabetes mellitus (ROCK-DM): Development and validation of a 4-variable prediction model. Prim Care Diabetes. 2025;19:312–21. https://doi.org/10.1016/j.pcd.2025.02.005.

16. Luo W, Lei L, Lai J, Liu Y, Liang H, Yan S, et al. A Risk Prediction Model for New-Onset Chronic Kidney Disease in the Elderly. Am J Nephrol. 2025;56:58–69. https://doi.org/10.1159/000541510.

17. Grant RC, He JC, Liu N, Podolsky S, Notta F, Ghassemi M, et al. Predicting Chronic Kidney Disease After Cisplatin Treatment Using Population-Level Data. JAMA Oncol. 2025;11:1179–85. https://doi.org/10.1001/jamaoncol.2025.2590.

18. Thapa R, Kjær MR, He B, Covert I, Moore H, Hanif U, et al. A Multimodal Sleep Foundation Model Developed with 500K Hours of Sleep Recordings for Disease Predictions. medRxiv. 2025;:2025.02.04.25321675. https://doi.org/10.1101/2025.02.04.25321675.
